# Supplementary material
Source: MDPI journal article supplement (https://www.mdpi.com/2072-4292/14/12/2770)
Supplement: s1 [file s1]

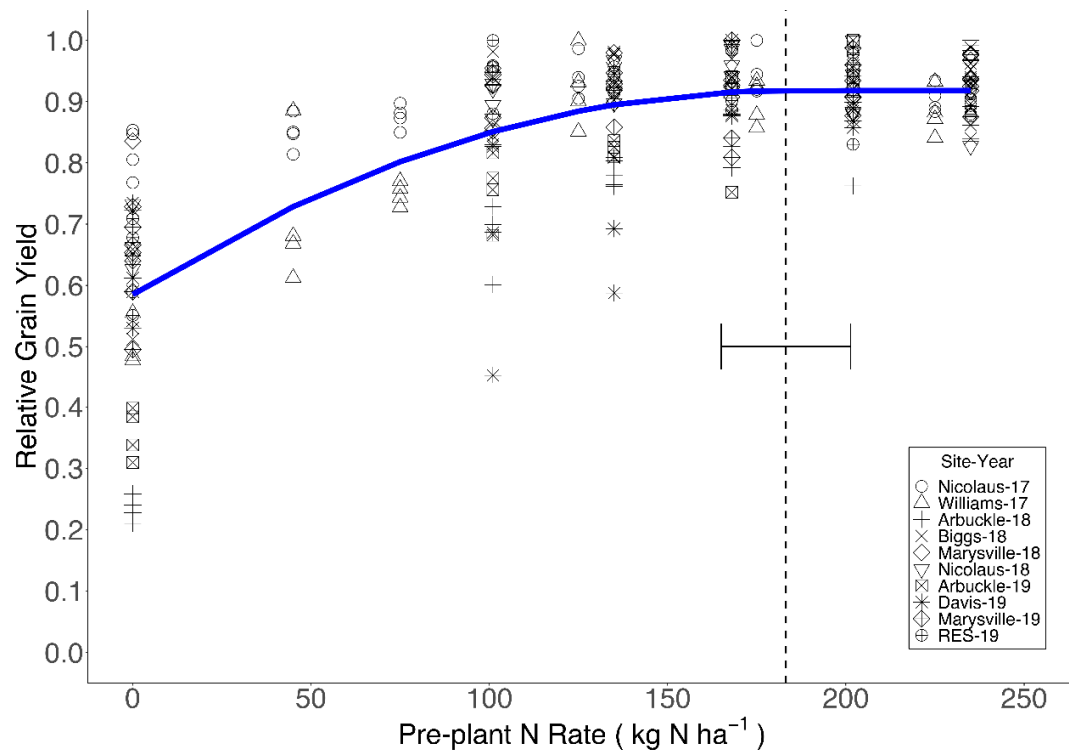

**Figure S1:** The relationship between pre-plant N rate and relative rice grain yield as described by a quadratic-plateau linear regression model. The vertical dashed line at 183 kg N ha<sup>-1</sup> represents the N rate where the relationship reaches a plateau, and the error bar around the line represents the standard error.
